# Supplementary material for: Pharmacological systems analysis defines EIF4A3 functions in cell-cycle and RNA stress granule formation
Source: PubMed Central journal article supplement (PMC6499833; doi:10.1038/s42003-019-0391-9), 2019-05-03

# Hela Cells

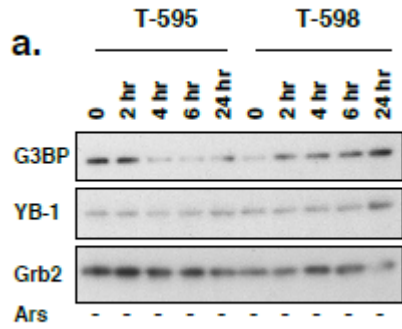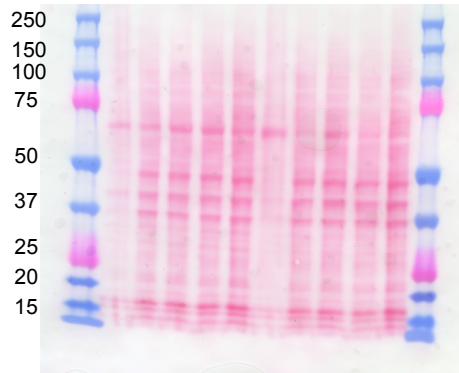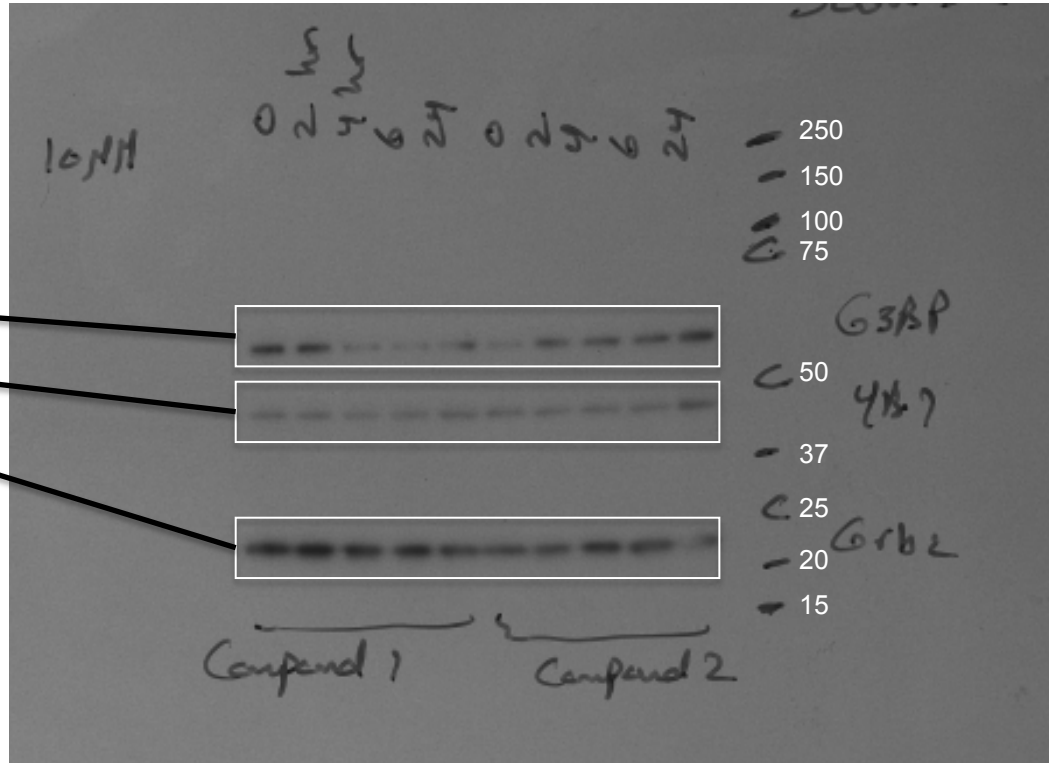

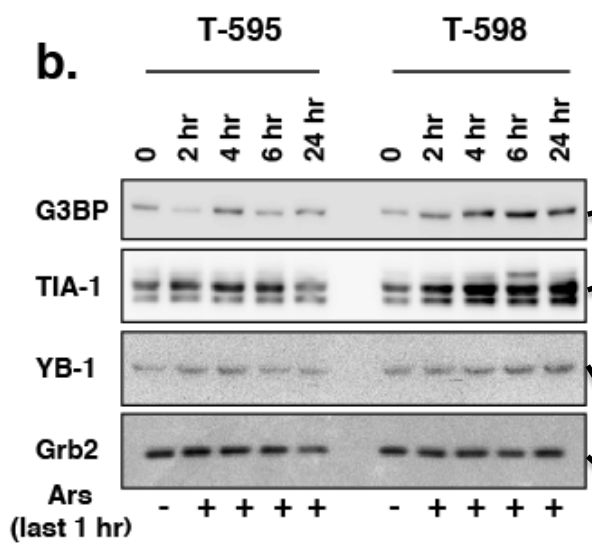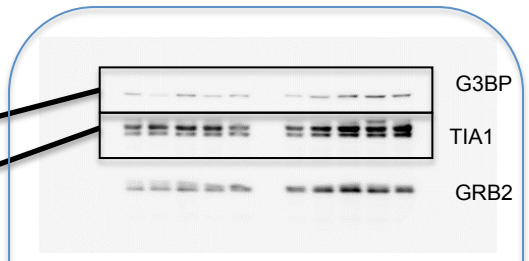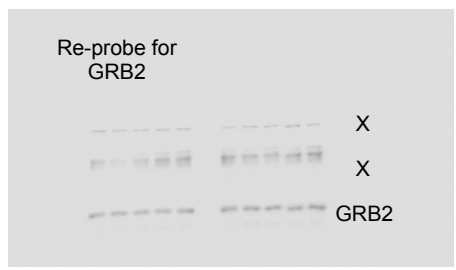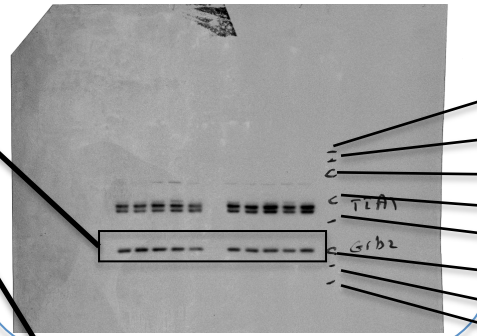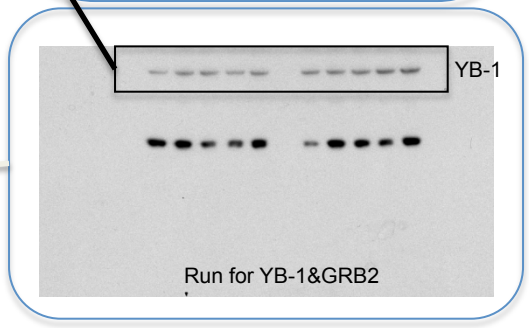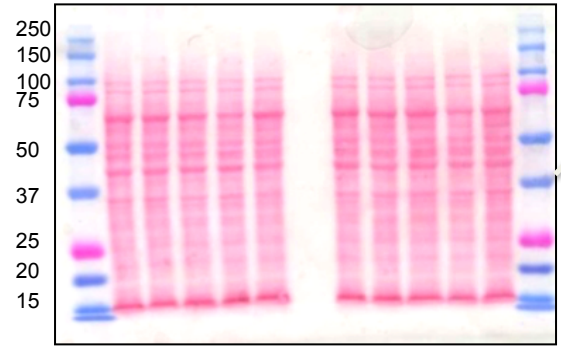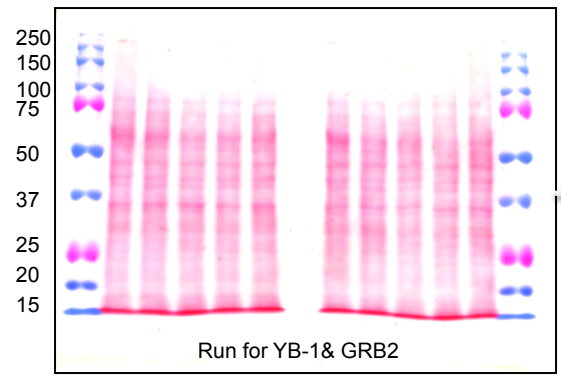

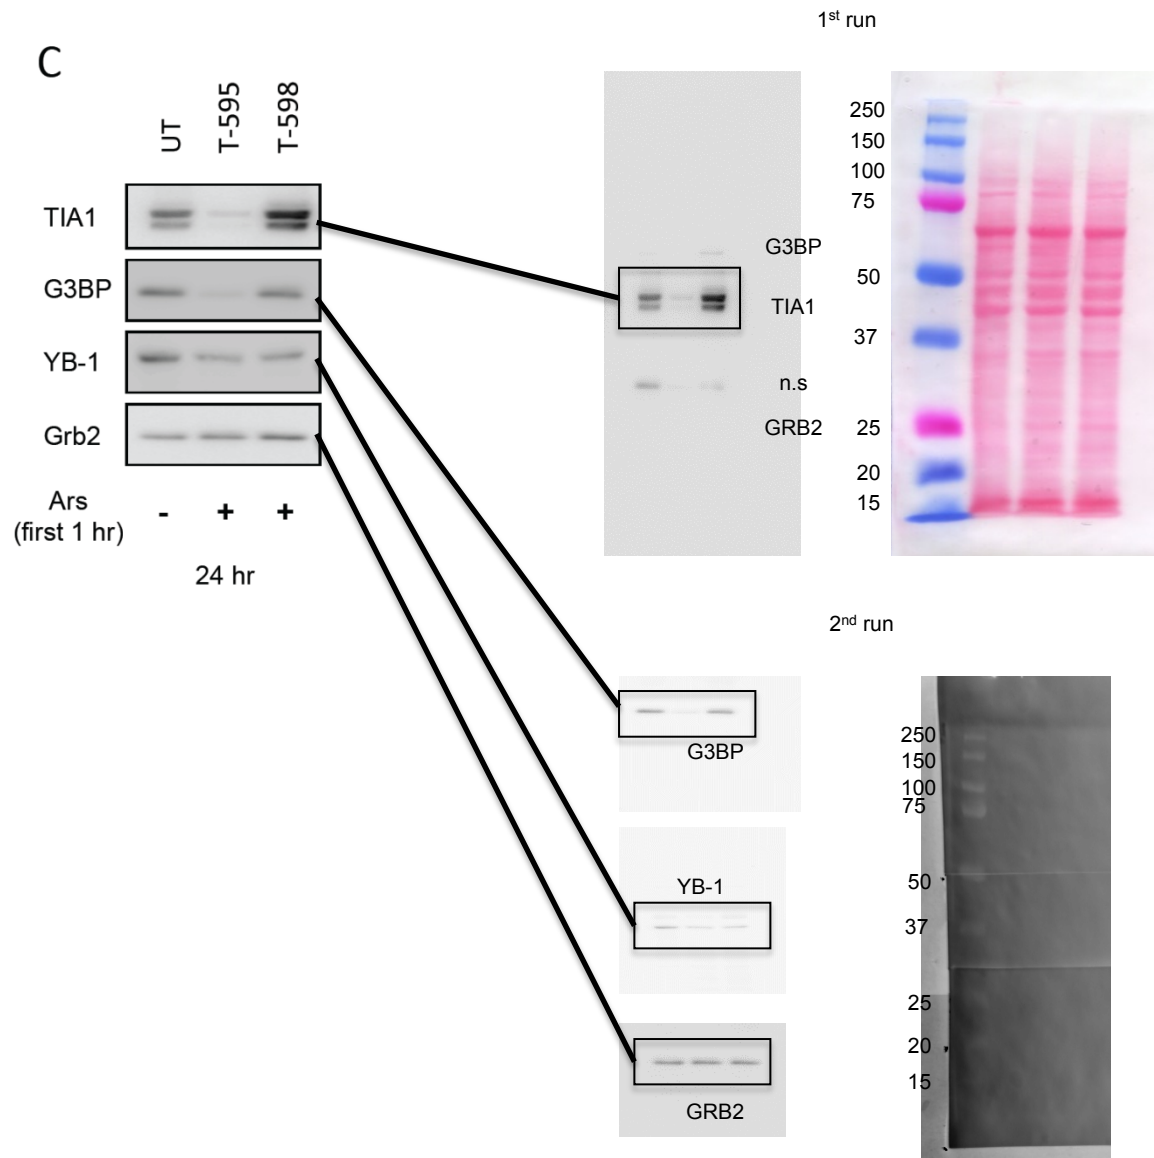

Supplement: 42003_2019_391_MOESM18_ESM.pdf [file 42003_2019_391_MOESM18_ESM.pdf]
